# Supplementary material
Source: ML conference proceedings conference paper supplement (https://openaccess.thecvf.com/content/CVPR2022/html/Gutierrez-Barragan_Compressive_Single-Photon_3D_CVPR_2022_paper.html)
Supplement: Supplementary file 1 [file Gutierrez-Barragan_Compressive_Single-Photon_3D_CVPR_2022_supplemental.zip]

Archive with 2 entries (2 files):
- README_v2_cameraready.md
- supplementary-doc_c-sp-3D_v6_camera-ready.pdf
