# Supplementary material
Source: ML conference proceedings conference paper supplement (https://openaccess.thecvf.com/content/CVPR2022/html/Gutierrez-Barragan_Compressive_Single-Photon_3D_CVPR_2022_paper.html)
Supplement: Supplementary file 1 [file Gutierrez-Barragan_Compressive_Single-Photon_3D_CVPR_2022_supplemental.zip › README_v2_cameraready.md]

# Supplementary Material for Compressive Single-Photon 3D Cameras

This folder contains the supplementary document for the CVPR 2022 paper Compressive Single-Photon 3D Cameras.

* `supplementary-doc_c-sp-3D_vXXX.pdf`: Supplementary document with additional results, visualizations, and analysis.

## Code and Data

Code and data used for the paper will be made available on the project page. The project page will be posted in the [first-authors webpage](https://pages.cs.wisc.edu/~felipe/) and the [UW-Madison Computational Optics group Webpage](https://biostat.wisc.edu/~compoptics/).

If you have trouble accessing the code and data please contact Felipe Gutierrez Barragan: fgutierrez3 at wisc dot edu
